# Supplementary material
Source: Royal Society of Chemistry journal article supplement (doi:10.1039/d6rp00196c)
Supplement: d6rp00196c1.pdf [file d6rp00196c1.pdf]

**Supplemental Information**

**Appendix S2 - C-SIQ Raw Data**

**Table S2.1. OVERALL TG1 vs TG2**

| SUMMARY - Anova: Single Factor, Comparing Test Group 1 with Test Group 2   |          |          |           |          |          |         |
|----------------------------------------------------------------------------|----------|----------|-----------|----------|----------|---------|
| Groups                                                                     | Count    | Sum      | Average   | Variance |          |         |
| TG1                                                                        | 58       | 142.3889 | 2.454981  | 0.27577  |          |         |
| TG2                                                                        | 58       | 128.9216 | 2.222785  | 0.23940  |          |         |
| ANOVA                                                                      |          |          |           |          |          |         |
| Source of Variation                                                        | SS       | df       | MS        | F        | P-value  | Fcrit   |
| Between Groups                                                             | 1.563526 | 1        | 1.5635260 | 6.069945 | 0.015244 | 3.92433 |
| Within Groups                                                              | 29.36468 | 114      | 0.0257585 |          |          |         |
| Total                                                                      | 30.92821 | 115      |           |          |          |         |
| Critical Value, $\alpha=0.05$                                              |          |          |           |          |          |         |
| For Test Group, P-value =0.015244, so we reject the null hypothesis $H_01$ |          |          |           |          |          |         |

**Table S2.2. OVERALL CG1 vs CG2**

| SUMMARY - Anova: Single Factor, Comparing Control Group 1 with Control Group 2        |          |          |          |          |          |         |
|---------------------------------------------------------------------------------------|----------|----------|----------|----------|----------|---------|
| Groups                                                                                | Count    | Sum      | Average  | Variance |          |         |
| CG1                                                                                   | 58       | 134.7222 | 2.322797 | 0.119647 |          |         |
| CG2                                                                                   | 58       | 138.1667 | 2.382184 | 0.120670 |          |         |
| ANOVA                                                                                 |          |          |          |          |          |         |
| Source of Variation                                                                   | SS       | df       | MS       | F        | P-value  | Fcrit   |
| Between Groups                                                                        | 0.102278 | 1        | 0.102278 | 0.326424 | 0.568897 | 3.92433 |
| Within Groups                                                                         | 35.71935 | 114      | 0.313328 |          |          |         |
| Total                                                                                 | 35.82163 | 115      |          |          |          |         |
| Critical Value, $\alpha=0.05$                                                         |          |          |          |          |          |         |
| For Control Group, P-value =0.568897, so we fail to reject the null hypothesis $H_02$ |          |          |          |          |          |         |

**Table S2.3. FEELINGS-RELATED VALENCES – TG1 VS TG2**

| SUMMARY - Anova: Single Factor, Comparing Feelings Related Valences for TG1 with Feeling Related Valences for TG2 |          |          |          |          |          |         |
|-------------------------------------------------------------------------------------------------------------------|----------|----------|----------|----------|----------|---------|
| Groups                                                                                                            | Count    | Sum      | Average  | Variance |          |         |
| Feeling Valences TG1                                                                                              | 58       | 141.4286 | 2.438424 | 0.254824 |          |         |
| Feeling Valences TG2                                                                                              | 58       | 134.1429 | 2.312808 | 0.201545 |          |         |
| ANOVA                                                                                                             |          |          |          |          |          |         |
| Source of Variation                                                                                               | SS       | df       | MS       | F        | P-value  | Fcrit   |
| Between Groups                                                                                                    | 0.457600 | 1        | 0.457600 | 2.005397 | 0.159467 | 3.92433 |
| Within Groups                                                                                                     | 26.01302 | 114      | 0.228184 |          |          |         |
| Total                                                                                                             | 26.47062 | 115      |          |          |          |         |
| Critical Value, $\alpha=0.05$                                                                                     |          |          |          |          |          |         |
| For Control Group, P-value =0.159467, so we fail to reject the null hypothesis $H_03$                             |          |          |          |          |          |         |

**Table S2.4 FEELINGS-RELATED VALENCES – CG1 VS CG2**

| SUMMARY - Anova: Single Factor, Comparing Feelings Related Valences for CG1 with Feeling Related Valences for CG2 |          |          |          |          |         |         |
|-------------------------------------------------------------------------------------------------------------------|----------|----------|----------|----------|---------|---------|
| Groups                                                                                                            | Count    | Sum      | Average  | Variance |         |         |
| Feeling Valences CG1                                                                                              | 58       | 135.7143 | 2.339901 | 0.283443 |         |         |
| Feeling Valences CG2                                                                                              | 58       | 139.5714 | 2.406404 | 0.317796 |         |         |
| ANOVA                                                                                                             |          |          |          |          |         |         |
| Source of Variation                                                                                               | SS       | df       | MS       | F        | P-value | Fcrit   |
| Between Groups                                                                                                    | 0.128255 | 1        | 0.128255 | 0.426635 | 0.51496 | 3.92433 |
| Within Groups                                                                                                     | 34.27058 | 114      | 0.300619 |          |         |         |
| Total                                                                                                             | 34.39884 | 115      |          |          |         |         |
| Critical Value, $\alpha=0.05$                                                                                     |          |          |          |          |         |         |
| For Control Group, P-value =0.51496, so we fail to reject the null hypothesis H <sub>04</sub>                     |          |          |          |          |         |         |

**Table S2.5. VALUE-RELATED VALENCES – TG1 VS TG2**

| SUMMARY - Anova: Single Factor, Comparing Value Related Valences for TG1 with Value Related Valences for TG2 |          |          |          |          |          |         |
|--------------------------------------------------------------------------------------------------------------|----------|----------|----------|----------|----------|---------|
| Groups                                                                                                       | Count    | Sum      | Average  | Variance |          |         |
| Value Valences TG1                                                                                           | 58       | 142.2857 | 2.453202 | 0.396089 |          |         |
| Value Valences TG2                                                                                           | 58       | 134.0000 | 2.310345 | 0.250725 |          |         |
| ANOVA                                                                                                        |          |          |          |          |          |         |
| Source of Variation                                                                                          | SS       | df       | MS       | F        | P-value  | Fcrit   |
| Between Groups                                                                                               | 0.591837 | 1        | 0.591837 | 1.830006 | 0.178804 | 3.92433 |
| Within Groups                                                                                                | 36.86840 | 114      | 0.323407 |          |          |         |
| Total                                                                                                        | 37.46024 | 115      |          |          |          |         |
| Critical Value, $\alpha=0.05$                                                                                |          |          |          |          |          |         |
| For Control Group, P-value =0.178804, so we fail to reject the null hypothesis H <sub>05</sub>               |          |          |          |          |          |         |

**Table S2.6. VALUE-RELATED VALENCES – CG1 VS CG2**

| SUMMARY - Anova: Single Factor, Comparing Value Related Valences for CG1 with Value Related Valences for CG2 |          |          |          |          |          |         |
|--------------------------------------------------------------------------------------------------------------|----------|----------|----------|----------|----------|---------|
| Groups                                                                                                       | Count    | Sum      | Average  | Variance |          |         |
| Value Valences CG1                                                                                           | 58       | 135.1429 | 2.330049 | 0.330975 |          |         |
| Value Valences CG2                                                                                           | 58       | 138.0000 | 2.379310 | 0.417867 |          |         |
| ANOVA                                                                                                        |          |          |          |          |          |         |
| Source of Variation                                                                                          | SS       | df       | MS       | F        | P-value  | Fcrit   |
| Between Groups                                                                                               | 0.070373 | 1        | 0.070373 | 0.187951 | 0.665446 | 3.92433 |
| Within Groups                                                                                                | 42.68403 | 114      | 0.374421 |          |          |         |
| Total                                                                                                        | 42.75440 | 115      |          |          |          |         |
| Critical Value, $\alpha=0.05$                                                                                |          |          |          |          |          |         |
| For Control Group, P-value =0.665446, so we fail to reject the null hypothesis H <sub>06</sub>               |          |          |          |          |          |         |

**Table S2.7. INTRINSIC ORIENTATION – TG1 VS TG2**

| SUMMARY - Anova: Single Factor, Comparing Intrinsic Orientation for TG1 with Intrinsic Orientation for TG2 |          |        |          |          |          |         |
|------------------------------------------------------------------------------------------------------------|----------|--------|----------|----------|----------|---------|
| Groups                                                                                                     | Count    | Sum    | Average  | Variance |          |         |
| Intrinsic Orientation TG1                                                                                  | 58       | 144.25 | 2.487069 | 0.435137 |          |         |
| Intrinsic Orientation TG2                                                                                  | 58       | 121.50 | 2.094828 | 0.247429 |          |         |
| ANOVA                                                                                                      |          |        |          |          |          |         |
| Source of Variation                                                                                        | SS       | df     | MS       | F        | P-value  | Fcrit   |
| Between Groups                                                                                             | 4.461746 | 1      | 4.461746 | 13.07345 | 0.000447 | 3.92433 |
| Within Groups                                                                                              | 38.90625 | 114    | 0.341283 |          |          |         |
| Total                                                                                                      | 43.36800 | 115    |          |          |          |         |
| Critical Value, $\alpha=0.05$                                                                              |          |        |          |          |          |         |
| For Control Group, P-value =0.000447, so we reject the null hypothesis $H_0$                               |          |        |          |          |          |         |

**Table S2.8. INTRINSIC ORIENTATION – CG1 VS CG2**

| SUMMARY - Anova: Single Factor, Comparing Intrinsic Orientation for CG1 with Intrinsic Orientation for CG2 |          |        |          |          |          |         |
|------------------------------------------------------------------------------------------------------------|----------|--------|----------|----------|----------|---------|
| Groups                                                                                                     | Count    | Sum    | Average  | Variance |          |         |
| Intrinsic Orientation CG1                                                                                  | 58       | 132.25 | 2.280172 | 0.493591 |          |         |
| Intrinsic Orientation CG2                                                                                  | 58       | 136.00 | 2.344828 | 0.613657 |          |         |
| ANOVA                                                                                                      |          |        |          |          |          |         |
| Source of Variation                                                                                        | SS       | df     | MS       | F        | P-value  | Fcrit   |
| Between Groups                                                                                             | 0.121228 | 1      | 0.121228 | 0.218972 | 0.640717 | 3.92433 |
| Within Groups                                                                                              | 63.11315 | 114    | 0.553624 |          |          |         |
| Total                                                                                                      | 63.23438 | 115    |          |          |          |         |
| Critical Value, $\alpha=0.05$                                                                              |          |        |          |          |          |         |
| For Control Group, P-value =0.640717, so we fail to reject the null hypothesis $H_0$                       |          |        |          |          |          |         |
